# Supplementary material for: Efficient blue and white polymer light emitting diodes based on a well charge balanced, core modified polyfluorene derivative
Source: Royal Society of Chemistry journal article supplement (doi:10.1039/c6cp00113k), 2016-01-01
Supplement: c6cp00113k1.pdf [file c6cp00113k1.pdf]

**Electronic supplementary information**

**Efficient Blue and White Polymer Light Emitting Diodes Based on a Well Charge Balanced, Core Modified Polyfluorene Derivative**

Dipjyoti Das,<sup>a</sup> Peddaboodi Gopikrishna,<sup>a</sup> Ashish Singh,<sup>a</sup> Anamika Dey<sup>a</sup> and Parameswar Krishnan Iyer<sup>a,b\*</sup>

<sup>a</sup> Centre for Nanotechnology, Indian Institute of Technology Guwahati, Guwahati781039, Assam, India

<sup>b</sup> Department of Chemistry, Indian Institute of Technology Guwahati, Guwahati-781039, Assam, India.

E-mail: pki@iitg.ernet.in; Fax: +0091 361 258 2349

| <b>Content</b>                                                                                                                            | <b>Page</b> |
|-------------------------------------------------------------------------------------------------------------------------------------------|-------------|
| <b>Fig. S1.</b> AFM images                                                                                                                | S2          |
| <b>Fig. S2.</b> Brightness vs. Current Density (B-J) (a) and Current Density vs. Voltage (J-V) (b) curves of the single layer Blue PLEDs. | S2          |
| <b>Fig. S3.</b> Brightness vs. Current Density (B-J) (a) and Current Density vs. Voltage (J-V) (b) curves of the multilayer Blue PLEDs.   | S3          |
| <b>Fig. S4.</b> Brightness vs. Current Density (B-J) (a) and Current Density vs. Voltage (J-V) (b) curves of the fabricated WPLEDs.       | S3          |
| <b>Fig. S5.</b> EL spectra of device W2 at different applied voltage.                                                                     | S4          |

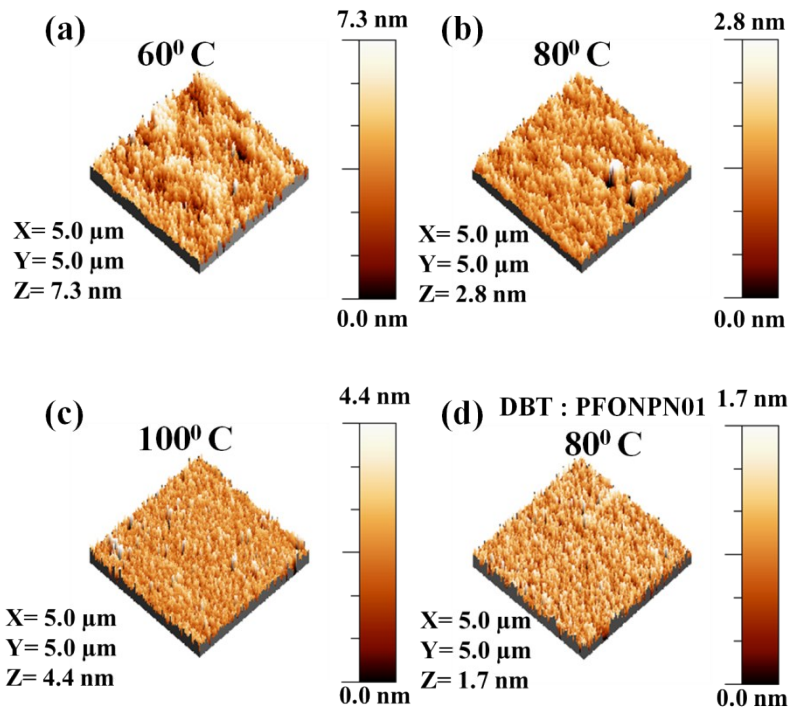

**Fig. S1** AFM images of the PFONPN01 thin films heated at various temperatures, (a) 60 °C, (b) 80 °C, (c) 100 °C and (d) DBT doped PFONPN01 thin films heated at 80 °C.

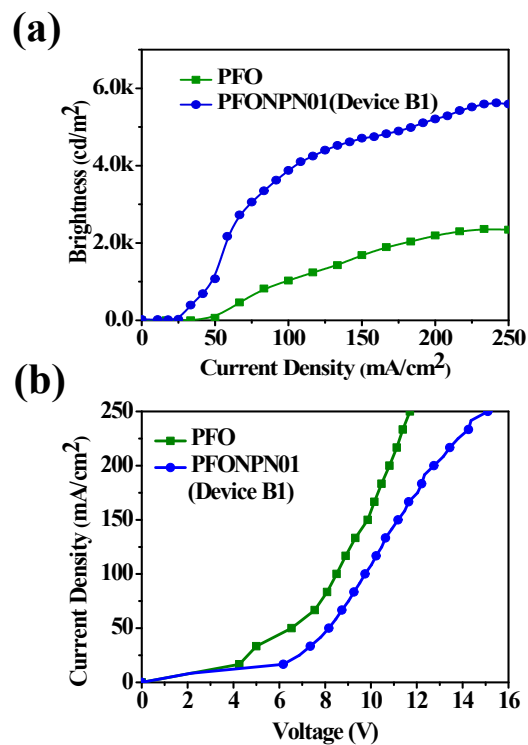

**Fig. S2** Brightness vs. Current Density (B-J) (a) and Current Density vs. Voltage (J-V) (b) curves of the single layer Blue PLEDs.

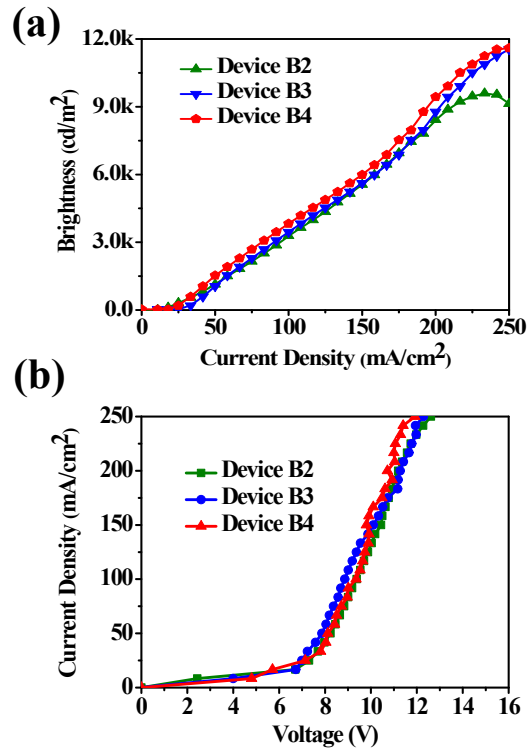

**Fig.S3** Brightness vs. Current Density (B-J) (a) and Current Density vs. Voltage (J-V) (b) curves of the multilayer Blue PLEDs.

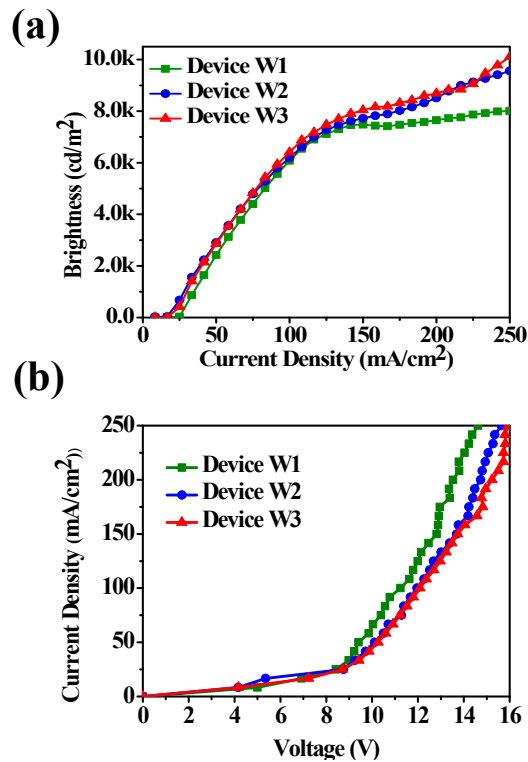

**Fig. S4** Brightness vs. Current Density (B-J) (a) and Current Density vs. Voltage (J-V) (b) curves of the fabricated WPLEDs.

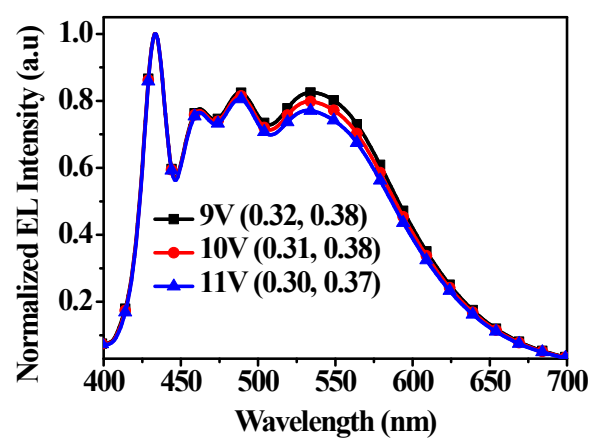

**Fig. S5** EL spectra of device W2 at different applied voltage.
